# Supplementary material for: Comparative Effectiveness of Treatments for Bacterial Vaginosis: A Network Meta-Analysis
Source: MDPI journal article supplement (doi:10.3390/antibiotics10080978), 2021-08-13
Supplement: s1 [file s1]

| Author                         | Country            | Region  | Ethnicity |
|--------------------------------|--------------------|---------|-----------|
| Ratna_M_&_Yelikar_K_2011       | India              | Asia    | Other     |
| Kovachec_S_&Dobrevski_R_2013a  | Bulgaria           | Europe  | Other     |
| Larsson_P_et_al_2008           | Norway             | Europe  | caucasian |
| Darwish_A_2007b                | Egypt              | Africa  | Other     |
| Brandt_et_al_2008              | Germany            | Europe  | caucasian |
| Darwish_A_2007a                | Egypt              | Africa  | Other     |
| Anukam_K_et_al_2006a           | Nigeria            | Africa  | Black     |
| Ling_Z_2012                    | China              | Asia    | Other     |
| Kovachec_S_&Dobrevski_R_2013b1 | Bulgaria           | Europe  | Other     |
| Paavonen_J_et_al_2000          | -                  | Europe  | Other     |
| Anukam_K_et_al_2006b           | Nigeria            | Africa  | Black     |
| Martínez_et_al_2009            | Brazil             | America | Other     |
| Marcone_V_et_al_2008           | Italy              | Europe  | Other     |
| Kovachec_S_&Dobrevski_R_2013b2 | Bulgaria           | Europe  | Other     |
| Voorspoels_J_et_al_2002a       | Belgium            | Europe  | caucasian |
| Voorspoels_J_et_al_2002b       | Belgium            | Europe  | caucasian |
| Voorspoels_J_et_al_2002c       | Belgium            | Europe  | caucasian |
| Kekki_M_et_al_2002             | Finland            | Europe  | caucasian |
| Kurkinen_M_et_al_2000          | Finlandia          | Europe  | caucasian |
| Eriksson_K_et_al_2005          | Sweden_Finland_Nor | Europe  | caucasian |
| Mastromarino_P_et_al_2009      | Italy              | Europe  | Other     |
| Vujic_G_et_al_2013             | Croatia            | Europe  | Other     |

| Pregnancy | events_tx1 | n_tx1 | events_tx2 | n_tx2 | TE           |
|-----------|------------|-------|------------|-------|--------------|
| NO        | 9          | 20    | 16         | 20    | -1.586965057 |
| NO        | 274        | 297   | 211        | 242   | 0.559762961  |
| NO        | 24         | 37    | 18         | 39    | 0.767255153  |
| SI        | 27         | 39    | 19         | 39    | 0.862223511  |
| NO        | 116        | 129   | 124        | 134   | -0.329055639 |
| SI        | 26         | 39    | 19         | 39    | 0.744440475  |
| NO        | 8          | 18    | 15         | 17    | -2.238046572 |
| NO        | 21         | 30    | 24         | 25    | -2.33075597  |
| NO        | 98         | 112   | 61         | 143   | 2.241755532  |
| NO        | 85         | 108   | 87         | 114   | 0.137085788  |
| NO        | 43         | 49    | 23         | 57    | 2.360306955  |
| NO        | 28         | 32    | 16         | 32    | 1.945910149  |
| NO        | 28         | 42    | 35         | 42    | -0.916290732 |
| NO        | 98         | 112   | 65         | 126   | 1.882396743  |
| NO        | 16         | 25    | 7          | 24    | 1.46266734   |
| NO        | 16         | 26    | 7          | 24    | 1.357306824  |
| NO        | 17         | 25    | 7          | 24    | 1.641074997  |
| SI        | 123        | 187   | 64         | 188   | 1.314699754  |
| SI        | 54         | 62    | 57         | 61    | -0.747214402 |
| NO        | 51         | 91    | 60         | 96    | -0.267879445 |
| NO        | 11         | 18    | 3          | 16    | 1.918322193  |
| NO        | 243        | 395   | 40         | 149   | 1.471649351  |

| sE          | tx1_lab                 |
|-------------|-------------------------|
| 0.717300636 | Only local AB           |
| 0.290043612 | Local AB+PB             |
| 0.47091862  | Local AB+PB             |
| 0.472230822 | Only oral AB            |
| 0.440009412 | Only oral AB            |
| 0.466922043 | Only oral AB            |
| 0.889756521 | Only local AB           |
| 1.095626225 | Only local AB           |
| 0.33199581  | Oral AB and Local AB+PB |
| 0.32214012  | Only local AB           |
| 0.512652422 | Oral AB+PB              |
| 0.640869944 | Oral AB+PB              |
| 0.527798663 | Only oral AB            |
| 0.336765068 | Oral AB and Local AB+PB |
| 0.61261063  | Only local AB           |
| 0.603473837 | Only local AB           |
| 0.620889847 | Only local AB           |
| 0.217817808 | Only local AB           |
| 0.641141465 | Only local AB           |
| 0.298416299 | Only local PB           |
| 0.802510214 | Only local PB           |
| 0.211821825 | Only oral PB            |

| tx2_lab              | A                                                     |
|----------------------|-------------------------------------------------------|
| Local AB and Oral PB | Only local AB (5-nitroimidazole)                      |
| Only local AB        | Local AB (5-nitroimidazole) + PB                      |
| Only local AB        | Local AB (clyndamicin) + PB                           |
| Only local AB        | Only oral AB (5-nitroimidazole)                       |
| Only local AB        | Only oral AB (5-nitroimidazole)                       |
| Only local AB        | Only oral AB (clyndamicin)                            |
| Only local PB        | Only local AB (5-nitroimidazole)                      |
| Only local PB        | Only local AB (5-nitroimidazole)                      |
| Only local PB        | Oral AB (clyndamicin) and Local AB (5-nitroimidazole) |
| Only oral AB         | Only local AB (clyndamicin)                           |
| Only oral AB         | Oral AB(5-nitroimidazole) + PB                        |
| Only oral AB         | Oral AB(5-nitroimidazole) + PB                        |
| Oral AB and Local PB | Only oral AB (5-nitroimidazole)                       |
| Oral AB and Local AB | Oral AB (clyndamicin) and Local AB (5-nitroimidazole) |
| placebo              | Only local AB (5-nitroimidazole)                      |
| placebo              | Only local AB (5-nitroimidazole)                      |
| placebo              | Only local AB (5-nitroimidazole)                      |
| placebo              | Only local AB (clyndamicin)                           |
| placebo              | Only local AB (clyndamicin)                           |
| placebo              | Only local PB                                         |
| placebo              | Only local PB                                         |
| placebo              | Only oral PB                                          |

[illegible]

|                                                                                    |
|------------------------------------------------------------------------------------|
| tx1_lab                                                                            |
| 1atb(oxofloxacino200+ornidazol500)-local-1vezdia/5dias-2(co-kimaxazol)local-1v3d   |
| 1atb(tinidaz2000)-local-1v/1d/2atb(metro)-local-1v/2dias/3pro(la+lrh)-local-1v/35d |
| 1atb(clindamicina100)-oral-1v/7d/2pro(lg+lrh)-local-1v-10d                         |
| Oral metro                                                                         |
| metro oral                                                                         |
| Oral clnda                                                                         |
| 1atb(metro37.5)-local2v/5d                                                         |
| intravag metro                                                                     |
| pro(la+lr)-local-1v10dias                                                          |
| Local Clionda                                                                      |
| 1atb(metro1000)-oral1v/7d/2pro(lrh+lr)-oral2v/30dias                               |
| 1atb(tinidaz2000)-oral1v/1d/2pro(rrh-lr)-oral1v/2dias                              |
| atb(metro500)-oral-2vezdia/7dias                                                   |
| pro(la+lr)-local-1v10dias                                                          |
| atb(metro100)-local-1vezdia/14dias                                                 |
| atb(metro250)-local-1vezdia/14dias                                                 |
| atb(metro500)-local-1vezdia/14dias                                                 |
| atb(clindamicina100)-local-1v/7d                                                   |
| atb(clinda100)-local-1v/7d                                                         |
| 3d-prO(lf-lrh-lga)-local                                                           |
| pro(L.bre-saliv-plant)-local-1vezdia/7dias                                         |
| pro(L.rh+L.r)-oral-2dias/42dias                                                    |

[illegible]
